# Supplementary material
Source: PubMed Central journal article supplement (PMC6025993)
Supplement: jci-128-98219-s302.pdf [file jci-128-98219-s302.pdf]

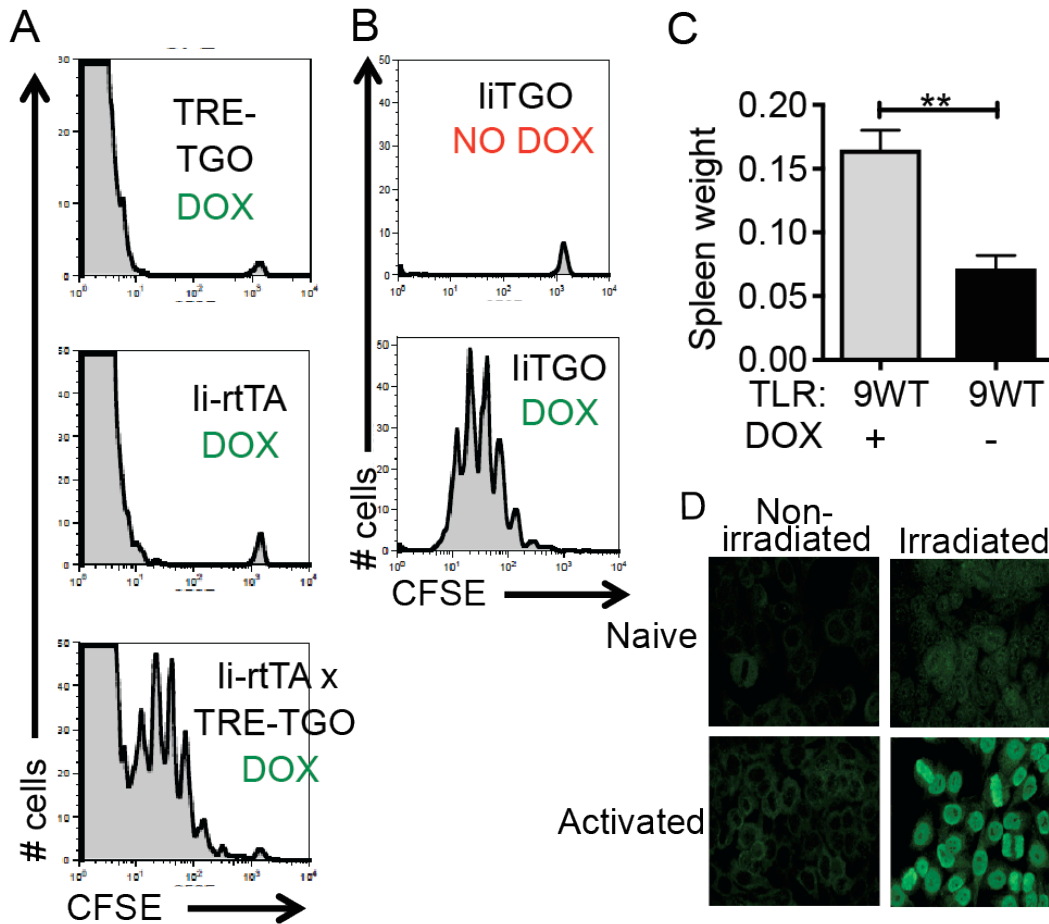

896

897 **Figure S1. Ii-TGO induced DO11 T cell activation and autoantibody production.** (A, B)

898 CFSE-labeled DO11 T cells were injected into TRE-TGO Tg, Ii-rtTA Tg and Ii-rtTA x TRE-

899 TGO (IiTGO) double Tg mice, that either were or were not provided with Dox, and proliferation

900 was evaluated at 5 days post injection. (C) Spleen weights (gms) of IiTGO mice injected with

901 DO11 T cells fed with or without Dox (n= 20 per group) (D) Non-irradiated or sub-lethally

902 (400R) irradiated mice were provided with Dox and injected with naïve or activated DO11 T

903 cells. Sera collected 4 weeks post-injection were assayed for autoantibody production by

904 immunofluorescent staining of HEP2 cells. Magnification-200X. **\*\**p* < 0.01** using two-tailed

905 Student's *t* test.

906

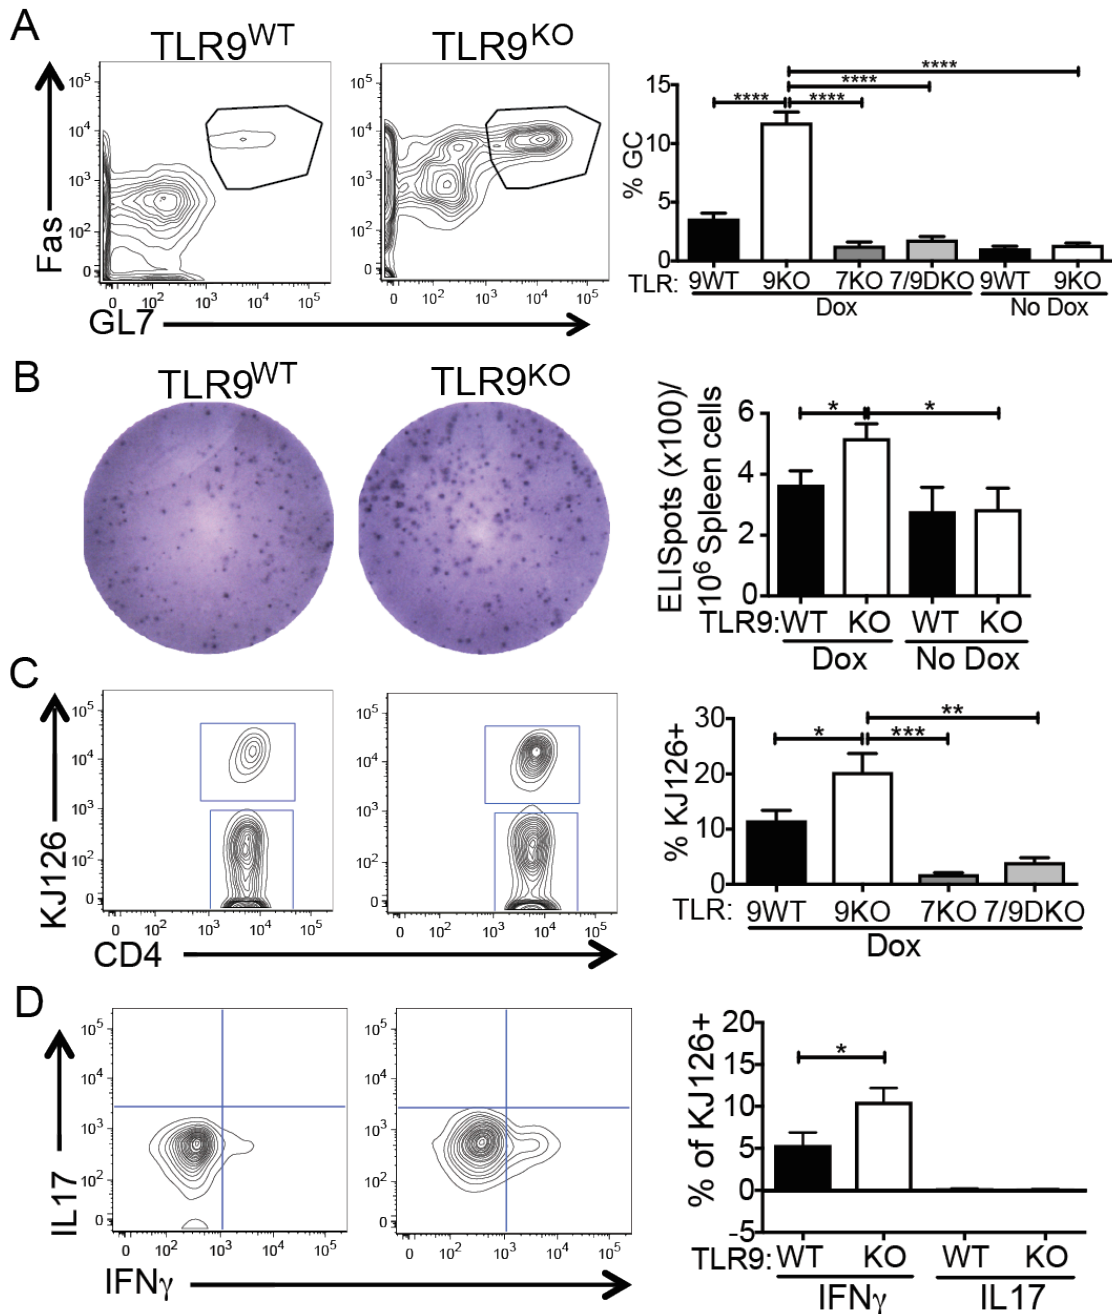

908

909 **Figure S2. TLR9-deficiency promotes germinal centers and development of T<sub>H</sub>1 in spleen.**  
 910 Spleen cell suspensions from DO11-injected Dox/400R TLR9<sup>WT</sup>, TLR9<sup>KO</sup>, TLR7<sup>KO</sup> and  
 911 TLR7/9<sup>DKO</sup> iITGO mice at 4 weeks post injection were analyzed for: (A) GC markers Fas and  
 912 GL7 in B220<sup>+</sup> gate; (B) plasma cells by ELISPOT assay; (C) % DO11 T cells in the CD4<sup>+</sup> gate;  
 913 and (D) % cytokine producing cells in KJ126<sup>+</sup> gate. Plots shown are representative of five  
 914 independent experiments with n=20 mice per group. \**p* < 0.05 and \*\*\*\**p* < 0.0001 using One-  
 915 way ANOVA with Sidak's multiple-comparison test.

916

917 **Supplemental Figure 3**

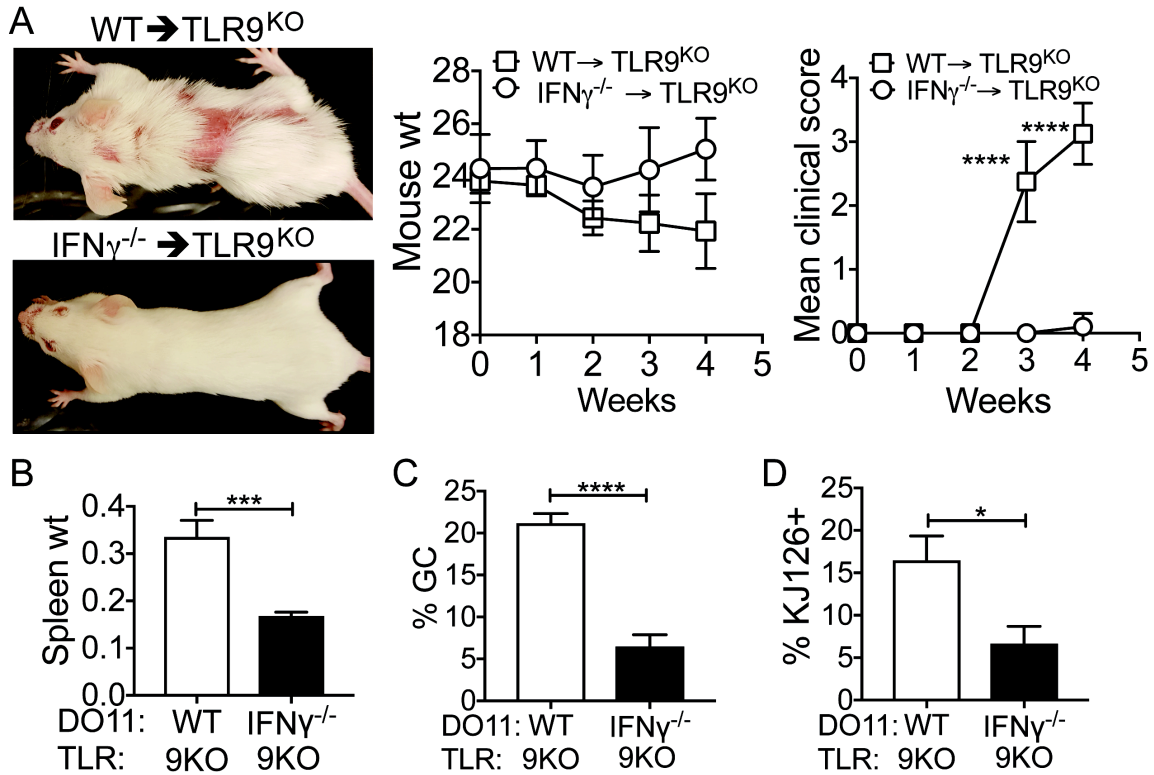

918  
919

920 **Figure S3: IFN $\gamma$ <sup>-/-</sup> DO11 T cells fail to induce skin lesion in TLR9<sup>KO</sup> IiTGO mice.** DO11 or  
921 IFN $\gamma$ <sup>-/-</sup> DO11 T cell-injected Dox/400R TLR9<sup>KO</sup> IiTGO recipients were analyzed 4 weeks post  
922 injection. (A) Clinical appearance, mouse weights (gms) and skin clinical score; (B) spleen  
923 weights; (C) Fas<sup>+</sup> and GL7<sup>+</sup> GC B220<sup>+</sup> cells in spleen; and (D) % KJ126<sup>+</sup> cells in the CD4<sup>+</sup> gate in  
924 spleen. Data is shown as mean $\pm$ SEM and is representative of two independent experiments with  
925 n=7 mice per group. \* $p$  < 0.05, \*\*\* $p$  < 0.001, \*\*\*\* $p$  < 0.0001 using Student's  $t$  test and two-way  
926 ANOVA with Sidak's multiple-comparison test.
